# Supplementary material
Source: PubMed Central journal article supplement (PMC5885842)

## Supplementary Online Content

Datar A, Nicosia N. Assessing social contagion in body mass index, overweight, and obesity using a natural experiment. *JAMA Pediatr*. Published online January 22, 2018. doi: 10.1001/jamapediatrics.2017.4882.

**eTable 1.** County Adult Obesity Rates for Assigned Installations of M-TEENS Sample

**eTable 2.** Comparison of Observed Characteristics of Measured and Unmeasured Sample

**eTable 3.** Comparison of Family Characteristics across High versus Low Obesity Counties

**eTable 4.** Falsification Test: Association between County Obesity Rate and Parent's and Child's Height

**eTable 5.** Comparison of Family Characteristics by On-Installation and Off-Installation Residence Status

**eTable 6.** Estimated Association Between County Obesity Rate and Parent and Child Outcomes Using Multiple Imputation for Missing Covariates

**eTable 7.** Relationship Between Residential County Obesity Rate and Parent's and Child's BMI, Overweight and Obesity

**eTable 8.** Associations Between County Obesity Rate and Child's BMI, Overweight and Obesity Based on Parent Reports

**eTable 9.** Association Between County Obesity Rate and Child's BMI, Overweight and Obesity, by Time-at-installation and On- Versus Off-Installation Residence

**eTable 10.** Association Between County Obesity Rate and Child's BMI, Overweight and Obesity, Controlling for Shared Built Environment in the County and in the Neighborhood

**eTable 11.** Relationship Between County Obesity Rate and Parent's and Child's BMI, Overweight and Obesity with Controls for Military Occupation

**eTable 12.** Relationship Between County Obesity Rate and Parent's and Child's BMI, Overweight and Obesity with Controls for Seniority

**eTable 13.** Relationship Between County Obesity Rate and Parent's and Child's BMI, Overweight and Obesity, by Length of Stay at Installation (Using 12 Month Cutoff)

**eTable 14.** Relationship Between County Obesity Rate and Parent's and Child's BMI, Overweight and Obesity, by Length of Stay at Installation (Using 18 Month Cutoff)

**eTable 15.** Relationship Between County Obesity Rate and Parent's and Child's BMI, Overweight and Obesity, by Length of Stay at Installation (Using 30 Month Cutoff)

**eTable 16.** Association Between County Obesity Rate and Child's BMI, Overweight, and Obesity Using Regression-Corrected Outcomes

**eTable 17.** Association Between County Obesity Rate and Other Child Body Composition Outcomes

**eTable 18.** Associations Between County Obesity Rate and Child's and Parent's Diet and Activity Behaviors and Home Environment

**eAppendix.** Shared Built Environment Measures

**eFigure 1.** Study Sample Flow Chart

**eReferences.** References.

This supplementary material has been provided by the authors to give readers additional information about their work.

**eTable 1.** County Adult Obesity Rates for Assigned Installations of M-TEENS Sample

| <b>County name, State</b> | <b>County Adult Obesity Rate (%)</b> |
|---------------------------|--------------------------------------|
| Anne Arundel, MD          | 28                                   |
| Bell, TX                  | 29                                   |
| Bexar, TX                 | 29                                   |
| Burlington, NJ            | 28                                   |
| Chattahoochee, GA         | 32                                   |
| Christian, KY             | 32                                   |
| Clark, NV                 | 26                                   |
| Cochise, AZ               | 25                                   |
| Comanche, OK              | 35                                   |
| Cumberland, NC            | 34                                   |
| Dale, AL                  | 36                                   |
| El Paso, CO               | 21                                   |
| El Paso, TX               | 24                                   |
| Fairfax, VA               | 24                                   |
| Frederick, MD             | 27                                   |
| Geary, KS                 | 30                                   |
| Greene, OH                | 30                                   |
| Hardin, KY                | 31                                   |
| Honolulu, HI              | 22                                   |
| Jefferson, NY             | 32                                   |
| Leavenworth, KS           | 32                                   |
| Liberty, GA               | 33                                   |
| Madison, AL               | 30                                   |
| Maricopa, AZ              | 23                                   |
| Newport News City, VA     | 34                                   |
| Orange, NY                | 26                                   |
| Pierce, WA                | 31                                   |
| Prince George, VA         | 36                                   |
| Pulaski, MS               | 34                                   |
| Richland, SC              | 31                                   |
| Richmond, GA              | 33                                   |
| Rock Island, IL           | 27                                   |
| Santa Rosa, FL            | 28                                   |
| Vernon, LA                | 38                                   |
| Yuma, AZ                  | 31                                   |

Notes: Range: 21%-38%; Mean=30%; Median=30%. For installations that straddled multiple counties, the obesity rate in the county with the largest population share was used. Also, for installation counties where respondents participated in both 2013 and 2014, obesity rates from the year with the larger sample are reported above.

The 2013 RWJ County Health Rankings data were merged to those MTEENS families who responded in 2013 and the 2014 RWJ County Health Rankings data for those who responded in 2014. The county obesity rate estimates in the RWJ County Health Rankings were computed by CDC using data from CDC's Behavioral Risk Factor Surveillance System (BRFSS) and from the US Census Bureau's Population Estimates Program. Three years of data were used to improve the precision of the year-specific county-level estimates of obesity. The obesity estimates are lagged in the RWJ data: the 2013 (2014) county obesity estimates are based on 2008-2010 (2009-2011) BRFSS and Census data. The table below shows the distribution of obesity rates for the installation counties where our sample was assigned.

The BRFSS is an ongoing, monthly, state-based telephone survey of the adult population aged 18 years or older that provides state-specific information on behavioral risk factors and preventive health practices.<sup>6</sup> Respondents were considered to be obese if their body mass index was 30 or greater. Body mass index (weight [kg]/height [m]<sup>2</sup>) was derived from self-report of height and weight. Estimates were restricted to adults aged 20 years or older to be consistent with the population estimates from the US Census Bureau.<sup>6</sup>

**eTable 2.** Comparison of Observed Characteristics of Measured and Unmeasured Sample

| <b>Variables</b>                                                                                                 | <b>Not Measured (1)</b> | <b>Measured (2)</b> | <b>p-value of difference (1)-(2)</b> |
|------------------------------------------------------------------------------------------------------------------|-------------------------|---------------------|--------------------------------------|
| Child is Female                                                                                                  | 0.497                   | 0.453               |                                      |
| Child's zBMI (self-report)                                                                                       | 0.221                   | 0.214               |                                      |
| Child overweight or obese (self-report)                                                                          | 0.262                   | 0.240               |                                      |
| Child obese (self-report)                                                                                        | 0.0880                  | 0.0900              |                                      |
| Child's zBMI (parent-report)                                                                                     | 0.218                   | 0.198               |                                      |
| Child overweight or obese (parent -report)                                                                       | 0.256                   | 0.247               |                                      |
| Child obese (parent -report)                                                                                     | 0.0940                  | 0.0970              |                                      |
| Responding parent's BMI (self-report)                                                                            | 27.76                   | 27.88               |                                      |
| Responding parent overweight or obese (self-report)                                                              | 0.763                   | 0.723               |                                      |
| Responding parent obese (self-report)                                                                            | 0.258                   | 0.283               |                                      |
| Child's Race-Ethnicity                                                                                           |                         |                     |                                      |
| White                                                                                                            | 0.381                   | 0.429               |                                      |
| Black                                                                                                            | 0.223                   | 0.209               |                                      |
| Hispanic                                                                                                         | 0.249                   | 0.238               |                                      |
| Other                                                                                                            | 0.146                   | 0.124               |                                      |
| Military Parent's Rank                                                                                           |                         |                     |                                      |
| E4 or less                                                                                                       | 0.101                   | 0.138               |                                      |
| E5                                                                                                               | 0.185                   | 0.183               |                                      |
| E6                                                                                                               | 0.309                   | 0.310               |                                      |
| E7                                                                                                               | 0.282                   | 0.269               |                                      |
| E8 or higher                                                                                                     | 0.123                   | 0.101               |                                      |
| Highest Education Level of Parents                                                                               |                         |                     |                                      |
| HS Diploma/GED or less                                                                                           | 0.0620                  | 0.0710              |                                      |
| Trade school or some college                                                                                     | 0.391                   | 0.323               |                                      |
| 2-year degree                                                                                                    | 0.272                   | 0.285               |                                      |
| 4-year degree or higher                                                                                          | 0.275                   | 0.321               |                                      |
| Annual Household Income                                                                                          |                         |                     |                                      |
| \$40,000 or less                                                                                                 | 0.209                   | 0.211               | P<0.05                               |
| \$40,001 to \$50,000                                                                                             | 0.177                   | 0.247               |                                      |
| \$50,001 - \$85,000                                                                                              | 0.492                   | 0.445               |                                      |
| \$85,001 or more                                                                                                 | 0.122                   | 0.0970              |                                      |
| Family lives on-installation                                                                                     | 0.397                   | 0.535               | P<0.01                               |
| Notes: Blank cells in last column indicate no statistically significant differences between columns (1) and (2). |                         |                     |                                      |

**eTable 3.** Comparison of Family Characteristics across High versus Low Obesity Counties

|                                                                                                                                                                          | County Adult Obesity Rate≤30% (N=475) | County Adult Obesity Rate>30% (N=839) | (1)-(2) |
|--------------------------------------------------------------------------------------------------------------------------------------------------------------------------|---------------------------------------|---------------------------------------|---------|
| Variables                                                                                                                                                                | (1)                                   | (2)                                   |         |
| Child is girl                                                                                                                                                            | 0.50                                  | 0.46                                  |         |
| Child's age (months)                                                                                                                                                     | 161.90                                | 162.00                                |         |
| Child's Race-Ethnicity                                                                                                                                                   |                                       |                                       |         |
| White                                                                                                                                                                    | 0.39                                  | 0.41                                  |         |
| Black                                                                                                                                                                    | 0.18                                  | 0.24                                  | P<0.05  |
| Hispanic                                                                                                                                                                 | 0.31                                  | 0.20                                  | P<0.01  |
| Other                                                                                                                                                                    | 0.12                                  | 0.15                                  |         |
| Responding parent is mother                                                                                                                                              | 0.41                                  | 0.45                                  |         |
| Responding parent's age (years)                                                                                                                                          | 36.78                                 | 36.40                                 |         |
| Responding parent is in military                                                                                                                                         | 0.75                                  | 0.73                                  |         |
| Parent married                                                                                                                                                           | 0.90                                  | 0.89                                  |         |
| Military Parent's Rank                                                                                                                                                   |                                       |                                       |         |
| E4 or less                                                                                                                                                               | 0.12                                  | 0.11                                  |         |
| E5                                                                                                                                                                       | 0.20                                  | 0.17                                  |         |
| E6                                                                                                                                                                       | 0.31                                  | 0.32                                  |         |
| E7                                                                                                                                                                       | 0.26                                  | 0.29                                  |         |
| E8 or higher                                                                                                                                                             | 0.12                                  | 0.12                                  |         |
| Highest Education Level of Parents                                                                                                                                       |                                       |                                       |         |
| HS Diploma/GED or less                                                                                                                                                   | 0.06                                  | 0.06                                  |         |
| Trade school or some college                                                                                                                                             | 0.36                                  | 0.36                                  |         |
| 2-year degree                                                                                                                                                            | 0.29                                  | 0.28                                  |         |
| 4-year degree or higher                                                                                                                                                  | 0.29                                  | 0.30                                  |         |
| Annual Household Income                                                                                                                                                  |                                       |                                       |         |
| \$40,000 or less                                                                                                                                                         | 0.22                                  | 0.20                                  |         |
| \$40,001 to \$50,000                                                                                                                                                     | 0.22                                  | 0.19                                  |         |
| \$50,001 - \$85,000                                                                                                                                                      | 0.49                                  | 0.48                                  |         |
| \$85,001 or more                                                                                                                                                         | 0.07                                  | 0.13                                  | P<0.01  |
| Family's Time as Installation                                                                                                                                            |                                       |                                       |         |
| ≤12 months                                                                                                                                                               | 0.11                                  | 0.11                                  |         |
| 13-24 months                                                                                                                                                             | 0.23                                  | 0.29                                  | P<0.05  |
| 25-48 months                                                                                                                                                             | 0.46                                  | 0.38                                  | P<0.01  |
| >48 months                                                                                                                                                               | 0.21                                  | 0.22                                  |         |
| Number of Children in Household                                                                                                                                          |                                       |                                       |         |
| 1 child                                                                                                                                                                  | 0.14                                  | 0.12                                  |         |
| 2 children                                                                                                                                                               | 0.32                                  | 0.35                                  |         |
| 3 or more children                                                                                                                                                       | 0.54                                  | 0.53                                  |         |
| Family lives on-installation                                                                                                                                             | 0.39                                  | 0.47                                  | P<0.01  |
| Notes: last column reports p-values for tests of difference in proportions (or means) between columns 1 and 2. Blanks indicate no statistically significant differences. |                                       |                                       |         |

**eTable 4.** Falsification Test: Association between County Obesity Rate and Parent’s and Child’s Height

| <b>Height</b>                                                                                                                                                                                                                                                                                                                                                                                                                                                                                                                                                                                                                                                                                                                                                                                                                                                                                                                                                                                                                                                                                                        | <b>Coeff</b> | <b>95% CI</b>    | <b>N</b> |
|----------------------------------------------------------------------------------------------------------------------------------------------------------------------------------------------------------------------------------------------------------------------------------------------------------------------------------------------------------------------------------------------------------------------------------------------------------------------------------------------------------------------------------------------------------------------------------------------------------------------------------------------------------------------------------------------------------------------------------------------------------------------------------------------------------------------------------------------------------------------------------------------------------------------------------------------------------------------------------------------------------------------------------------------------------------------------------------------------------------------|--------------|------------------|----------|
| Parent height (inches)                                                                                                                                                                                                                                                                                                                                                                                                                                                                                                                                                                                                                                                                                                                                                                                                                                                                                                                                                                                                                                                                                               | -0.012       | (-0.061 - 0.037) | 1,322    |
| Child height (inches, self-reported)                                                                                                                                                                                                                                                                                                                                                                                                                                                                                                                                                                                                                                                                                                                                                                                                                                                                                                                                                                                                                                                                                 | 0.005        | (-0.048 - 0.059) | 1,125    |
| Child height (inches, parent-reported)                                                                                                                                                                                                                                                                                                                                                                                                                                                                                                                                                                                                                                                                                                                                                                                                                                                                                                                                                                                                                                                                               | -0.011       | (-0.050 - 0.029) | 1,300    |
| Child height (measured)                                                                                                                                                                                                                                                                                                                                                                                                                                                                                                                                                                                                                                                                                                                                                                                                                                                                                                                                                                                                                                                                                              | 0.004        | (-0.064 - 0.071) | 462      |
| <p>Notes: Estimates are from linear regression models that control for installation county obesity rate; respondent’s age, gender, and race/ethnicity (non-Hispanic white, non-Hispanic black, Hispanic/Latino, Other); parent’s marital status, highest education level among child’s parents (High school or less; trade, technical or some college; Associate degree or equivalent; 4 year college or higher), military parent’s rank (Corporal/Specialist or lower; Sergeant; Staff Sergeant; Sergeant First Class; Master Sergeant/First Sergeant or higher); household income (&lt;=\$40,000; \$40,001-\$50,000; \$50,001-\$85,000; \$85,001 or higher), number of children in the household (1, 2 and 3 or more), on-installation residence, and months at current installation (&lt;=12, 13-24, 25-48 and &gt;=49). Reference Categories: Male, White non-Hispanic, living off-installation, non-military parent respondent, unmarried, rank Corporal/Specialist or less, less than high school degree, household income&lt;=40,000, one child in household, and at current installation &lt;=12 months.</p> |              |                  |          |

**eTable 5.** Comparison of Family Characteristics by On-Installation and Off-Installation Residence Status

| Variables                                           | Off-Installation (1) | On-Installation (2) | p-value of difference (1)-(2) |
|-----------------------------------------------------|----------------------|---------------------|-------------------------------|
| Child is female                                     | 0.476                | 0.493               |                               |
| Child's Race-Ethnicity                              |                      |                     |                               |
| White                                               | 0.388                | 0.410               |                               |
| Black                                               | 0.215                | 0.215               |                               |
| Hispanic                                            | 0.254                | 0.236               |                               |
| Other                                               | 0.142                | 0.139               |                               |
| Child's zBMI (self-report)                          | 0.287                | 0.245               |                               |
| Child overweight or obese (self-report)             | 0.271                | 0.239               |                               |
| Child obese (self-report)                           | 0.100                | 0.0780              |                               |
| Child's zBMI (parent-report)                        | 0.201                | 0.266               |                               |
| Child overweight or obese (parent -report)          | 0.244                | 0.262               |                               |
| Child obese (parent -report)                        | 0.0940               | 0.0980              |                               |
| Responding parent's BMI (self-report)               | 27.80                | 27.82               |                               |
| Responding parent overweight or obese (self-report) | 0.760                | 0.736               |                               |
| Responding parent obese (self-report)               | 0.264                | 0.273               |                               |
| Responding parent is mother                         | 0.439                | 0.460               |                               |
| Responding parent's age (years)                     | 37.03                | 36.06               | p<0.01                        |
| Responding parent is in military                    | 0.748                | 0.682               | p<0.01                        |
| Responding parent is married                        | 0.878                | 0.920               | p<0.01                        |
| Military Parent's Rank                              |                      |                     | p<0.01                        |
| E4 or less                                          | 0.0750               | 0.161               |                               |
| E5                                                  | 0.132                | 0.246               |                               |
| E6                                                  | 0.316                | 0.303               |                               |
| E7                                                  | 0.331                | 0.212               |                               |
| E8 or higher                                        | 0.146                | 0.0790              |                               |
| Highest Education Level of Parents                  |                      |                     | p<0.01                        |
| HS Diploma/GED or less                              | 0.0520               | 0.0810              |                               |
| Trade school or some college                        | 0.338                | 0.398               |                               |
| 2-year degree                                       | 0.288                | 0.267               |                               |
| 4-year degree or higher                             | 0.322                | 0.254               |                               |
| Annual Household Income                             |                      |                     | p<0.01                        |
| \$40,000 or less                                    | 0.141                | 0.295               |                               |
| \$40,001 to \$50,000                                | 0.172                | 0.239               |                               |
| \$50,001 to \$85,000                                | 0.530                | 0.407               |                               |
| \$85,001 or more                                    | 0.157                | 0.0590              |                               |
| Family's Time at Installation                       |                      |                     | p<0.01                        |
| <=12 months                                         | 0.110                | 0.0980              |                               |
| 13-24 months                                        | 0.227                | 0.331               |                               |
| 25-48 months                                        | 0.404                | 0.395               |                               |
| >48 months                                          | 0.259                | 0.176               |                               |
| Number of Children in Household                     |                      |                     | p<0.01                        |
| 1 child                                             | 0.157                | 0.100               |                               |
| 2 children                                          | 0.351                | 0.312               |                               |
| 3 or more children                                  | 0.492                | 0.588               |                               |

Notes: Blank cells in last column indicate no statistically significant differences between columns (1) and (2).



**eTable 6.** Estimated Association Between County Obesity Rate and Parent and Child Outcomes Using Multiple Imputation for Missing Covariates

| Dependent Variable                                                                                                                                                                                                                                                                                                                                                                                                                                                                                                                                                                                                                                                                                                                                                                                                                                                                                                                                                                                                                                                                                                                                                                                 |                   | Estimate | 95% CI        |
|----------------------------------------------------------------------------------------------------------------------------------------------------------------------------------------------------------------------------------------------------------------------------------------------------------------------------------------------------------------------------------------------------------------------------------------------------------------------------------------------------------------------------------------------------------------------------------------------------------------------------------------------------------------------------------------------------------------------------------------------------------------------------------------------------------------------------------------------------------------------------------------------------------------------------------------------------------------------------------------------------------------------------------------------------------------------------------------------------------------------------------------------------------------------------------------------------|-------------------|----------|---------------|
| <b>Parent Outcomes</b> (self-reports)<br>n=1429                                                                                                                                                                                                                                                                                                                                                                                                                                                                                                                                                                                                                                                                                                                                                                                                                                                                                                                                                                                                                                                                                                                                                    |                   |          |               |
| <i>BMI</i>                                                                                                                                                                                                                                                                                                                                                                                                                                                                                                                                                                                                                                                                                                                                                                                                                                                                                                                                                                                                                                                                                                                                                                                         | <i>beta coeff</i> | 0.07**   | (0.01 - 0.13) |
| <i>Overweight or obese</i>                                                                                                                                                                                                                                                                                                                                                                                                                                                                                                                                                                                                                                                                                                                                                                                                                                                                                                                                                                                                                                                                                                                                                                         | <i>AOR</i>        | 1.00     | (0.98 - 1.03) |
| <i>Obese</i>                                                                                                                                                                                                                                                                                                                                                                                                                                                                                                                                                                                                                                                                                                                                                                                                                                                                                                                                                                                                                                                                                                                                                                                       | <i>AOR</i>        | 1.04***  | (1.02 - 1.06) |
| <b>Child Outcomes</b> (self-reports)<br>n=1227                                                                                                                                                                                                                                                                                                                                                                                                                                                                                                                                                                                                                                                                                                                                                                                                                                                                                                                                                                                                                                                                                                                                                     |                   |          |               |
| <i>BMI z-score</i>                                                                                                                                                                                                                                                                                                                                                                                                                                                                                                                                                                                                                                                                                                                                                                                                                                                                                                                                                                                                                                                                                                                                                                                 | <i>beta coeff</i> | 0.01***  | (0.01 - 0.02) |
| <i>Overweight or obese</i>                                                                                                                                                                                                                                                                                                                                                                                                                                                                                                                                                                                                                                                                                                                                                                                                                                                                                                                                                                                                                                                                                                                                                                         | <i>AOR</i>        | 1.02*    | (1.00 - 1.05) |
| <i>Obese</i>                                                                                                                                                                                                                                                                                                                                                                                                                                                                                                                                                                                                                                                                                                                                                                                                                                                                                                                                                                                                                                                                                                                                                                                       | <i>AOR</i>        | 1.00     | (0.97 - 1.02) |
| Notes: beta coeff: linear regression coefficient; AOR: Adjusted Odds Ratio from logistic regression. * p<0.10, ** p<0.05, *** p<0.01.<br>All regressions control for installation county obesity rate; respondent's age, gender, and race/ethnicity (non-Hispanic white, non-Hispanic black, Hispanic/Latino, Other); parent's marital status, highest education level among child's parents (High school or less; trade, technical or some college; Associate degree or equivalent; 4 year college or higher), military parent's rank (Corporal/Specialist or lower; Sergeant; Staff Sergeant; Sergeant First Class; Master Sergeant/First Sergeant or higher); household income (<=\$40,000; \$40,001-\$50,000; \$50,001-\$85,000; \$85,001 or higher), number of children in the household (1, 2 and 3 or more), on-installation residence, and months at current installation (<=12, 13-24, 25-48 and >=49).<br>Reference Categories: Male, White non-Hispanic, living off-installation, non-military parent respondent, unmarried, rank Corporal/Specialist or less, less than high school degree, household income<=40,000, one child in household, and at current installation <=12 months. |                   |          |               |

Of the 1519 families who participated in the M-TEENS, 205 parents and 401 children had missing data on at least one of the variables used in the estimation. In addition, there were 7 children for whom either the parent-reported or self-reported zBMI was an outlier (beyond +/- 6)<sup>16</sup> so these cases were also dropped from the analysis sample. The missing data among parents was due to item non-response whereas missing data among children was due to a combination of survey non-response and item non-response. We also estimated our models on the sample where missing data for covariates was imputed using multiple imputation methods. These results were very similar to those presented in the paper and those from the main model are shown above.

We also compared the observed characteristics between responding families (N=1519) and non-responding families (N=17,469). We had very limited information on non-responding families from the Army personnel data extract, which included the service-member's gender, race/ethnicity, paygrade, and occupation. Compared to non-responding families, families that participated were more likely to have a female service-member. However, there were no substantive differences by race/ethnicity, paygrade, or occupation.

**eTable 7.** Relationship Between Residential County Obesity Rate and Parent’s and Child’s BMI, Overweight and Obesity

| Dependent Variable                                                                                                                                                                                                                                                                                                                                                                                                                                                                                                                                                                                                                                                                                                                                                                                                                                                                                                                                                                                                                                                                                                                                                       |             | Full Sample |                |       | Sample that lives in installation county |               |       |
|--------------------------------------------------------------------------------------------------------------------------------------------------------------------------------------------------------------------------------------------------------------------------------------------------------------------------------------------------------------------------------------------------------------------------------------------------------------------------------------------------------------------------------------------------------------------------------------------------------------------------------------------------------------------------------------------------------------------------------------------------------------------------------------------------------------------------------------------------------------------------------------------------------------------------------------------------------------------------------------------------------------------------------------------------------------------------------------------------------------------------------------------------------------------------|-------------|-------------|----------------|-------|------------------------------------------|---------------|-------|
|                                                                                                                                                                                                                                                                                                                                                                                                                                                                                                                                                                                                                                                                                                                                                                                                                                                                                                                                                                                                                                                                                                                                                                          |             | Estimate    | 95% CI         | N     | Estimate                                 | 95% CI        | N     |
| <b>Parent Outcomes</b> (from self-reported hgt/wgt)                                                                                                                                                                                                                                                                                                                                                                                                                                                                                                                                                                                                                                                                                                                                                                                                                                                                                                                                                                                                                                                                                                                      |             |             |                |       |                                          |               |       |
| <i>BMI</i>                                                                                                                                                                                                                                                                                                                                                                                                                                                                                                                                                                                                                                                                                                                                                                                                                                                                                                                                                                                                                                                                                                                                                               | <i>beta</i> | 0.06**      | (0.01 - 0.12)  | 1,313 | 0.07**                                   | (0.01 - 0.13) | 1,083 |
| <i>Overweight or obese</i>                                                                                                                                                                                                                                                                                                                                                                                                                                                                                                                                                                                                                                                                                                                                                                                                                                                                                                                                                                                                                                                                                                                                               | <i>AOR</i>  | 0.99        | (0.97 - 1.02)  | 1,313 | 1.01                                     | (0.98 - 1.04) | 1,083 |
| <i>Obese</i>                                                                                                                                                                                                                                                                                                                                                                                                                                                                                                                                                                                                                                                                                                                                                                                                                                                                                                                                                                                                                                                                                                                                                             | <i>AOR</i>  | 1.05***     | (1.03 - 1.08)  | 1,313 | 1.04***                                  | (1.01 - 1.08) | 1,083 |
| <b>Child Outcomes</b> (from self-reported hgt/wgt)                                                                                                                                                                                                                                                                                                                                                                                                                                                                                                                                                                                                                                                                                                                                                                                                                                                                                                                                                                                                                                                                                                                       |             |             |                |       |                                          |               |       |
| <i>BMI z-score</i>                                                                                                                                                                                                                                                                                                                                                                                                                                                                                                                                                                                                                                                                                                                                                                                                                                                                                                                                                                                                                                                                                                                                                       | <i>beta</i> | 0.01        | (-0.00 - 0.01) | 1,110 | 0.01**                                   | (0.00 - 0.02) | 919   |
| <i>Overweight or obese</i>                                                                                                                                                                                                                                                                                                                                                                                                                                                                                                                                                                                                                                                                                                                                                                                                                                                                                                                                                                                                                                                                                                                                               | <i>AOR</i>  | 1.03***     | (1.01 - 1.05)  | 1,110 | 1.03***                                  | (1.01 - 1.05) | 919   |
| <i>Obese</i>                                                                                                                                                                                                                                                                                                                                                                                                                                                                                                                                                                                                                                                                                                                                                                                                                                                                                                                                                                                                                                                                                                                                                             | <i>AOR</i>  | 1.01        | (0.98 - 1.05)  | 1,110 | 1.00                                     | (0.96 - 1.03) | 919   |
| Notes: beta coeff: linear regression coefficient; AOR: Adjusted Odds Ratio. * p<0.10, ** p<0.05, *** p<0.01<br>All regressions control for installation county obesity rate; respondent’s age, gender, and race/ethnicity (non-Hispanic white, non-Hispanic black, Hispanic/Latino, Other); parent’s marital status, highest education level among child’s parents (High school or less; trade, technical or some college; Associate degree or equivalent; 4 year college or higher), military parent’s rank (Corporal/Specialist or lower; Sergeant; Staff Sergeant; Sergeant First Class; Master Sergeant/First Sergeant or higher); household income (<=\$40,000; \$40,001-\$50,000; \$50,001-\$85,000; \$85,001 or higher), number of children in the household (1, 2 and 3 or more), on-installation residence, and months at current installation (<=12, 13-24, 25-48 and >=49).<br>Reference Categories: Male, White non-Hispanic, living off-installation, non-military parent respondent, unmarried, rank Corporal/Specialist or less, less than high school degree, household income<=40,000, one child in household, and at current installation <=12 months. |             |             |                |       |                                          |               |       |

**eTable 8.** Associations Between County Obesity Rate and Child’s BMI, Overweight and Obesity Based on Parent Reports

| Dependent Variable                                                                                                                                                                                                                                                                                                                                                                                                                                                                                                                                                                                                                                                                                                                                                                                                                                                                                                                                                                                                                                                                                                                                                                                                              |                   | Adjusted |                | Unadjusted |                |
|---------------------------------------------------------------------------------------------------------------------------------------------------------------------------------------------------------------------------------------------------------------------------------------------------------------------------------------------------------------------------------------------------------------------------------------------------------------------------------------------------------------------------------------------------------------------------------------------------------------------------------------------------------------------------------------------------------------------------------------------------------------------------------------------------------------------------------------------------------------------------------------------------------------------------------------------------------------------------------------------------------------------------------------------------------------------------------------------------------------------------------------------------------------------------------------------------------------------------------|-------------------|----------|----------------|------------|----------------|
|                                                                                                                                                                                                                                                                                                                                                                                                                                                                                                                                                                                                                                                                                                                                                                                                                                                                                                                                                                                                                                                                                                                                                                                                                                 |                   | Estimate | 95% CI         | Estimate   | 95% CI         |
| <b>Child Outcomes</b> (parent-reports)<br>(n=1,288)                                                                                                                                                                                                                                                                                                                                                                                                                                                                                                                                                                                                                                                                                                                                                                                                                                                                                                                                                                                                                                                                                                                                                                             |                   |          |                |            |                |
| <i>BMI z-score</i>                                                                                                                                                                                                                                                                                                                                                                                                                                                                                                                                                                                                                                                                                                                                                                                                                                                                                                                                                                                                                                                                                                                                                                                                              | <i>beta coeff</i> | 0.01     | (-0.00 - 0.02) | 0.01*      | (-0.00 - 0.02) |
| <i>Overweight or obese</i>                                                                                                                                                                                                                                                                                                                                                                                                                                                                                                                                                                                                                                                                                                                                                                                                                                                                                                                                                                                                                                                                                                                                                                                                      | <i>OR</i>         | 1.04***  | (1.01 - 1.07)  | 1.04***    | (1.01 - 1.06)  |
| <i>Obese</i>                                                                                                                                                                                                                                                                                                                                                                                                                                                                                                                                                                                                                                                                                                                                                                                                                                                                                                                                                                                                                                                                                                                                                                                                                    | <i>OR</i>         | 1.00     | (0.97 - 1.03)  | 1.00       | (0.97 - 1.03)  |
| <p>Notes: beta coeff: linear regression coefficient; AOR: Adjusted Odds Ratio. * p&lt;0.10, ** p&lt;0.05, *** p&lt;0.01<br/>           All regressions control for installation county obesity rate; respondent’s age, gender, and race/ethnicity (non-Hispanic white, non-Hispanic black, Hispanic/Latino, Other); parent’s marital status, highest education level among child’s parents (High school or less; trade, technical or some college; Associate degree or equivalent; 4 year college or higher), military parent’s rank (Corporal/Specialist or lower; Sergeant; Staff Sergeant; Sergeant First Class; Master Sergeant/First Sergeant or higher); household income (&lt;=\$40,000; \$40,001-\$50,000; \$50,001-\$85,000; \$85,001 or higher), number of children in the household (1, 2 and 3 or more), on-installation residence, and months at current installation (&lt;=12, 13-24, 25-48 and &gt;=49).<br/>           Reference Categories: Male, White non-Hispanic, living off-installation, non-military parent respondent, unmarried, rank Corporal/Specialist or less, less than high school degree, household income&lt;=40,000, one child in household, and at current installation &lt;=12 months.</p> |                   |          |                |            |                |

**eTable 9.** Association Between County Obesity Rate and Child's BMI, Overweight and Obesity, by Time-at-installation and On- Versus Off- Installation Residence

| <b>PANEL A: By Length of Stay at Installation</b>                                                                                                                                                                                                                                                                                                                                                                                                                                                                                                                                                                                                                                                                                                                                                                                                                                                                                                                                                                                                                                                                                                                        |                   |                         |                |          |                        |                 |                |          |
|--------------------------------------------------------------------------------------------------------------------------------------------------------------------------------------------------------------------------------------------------------------------------------------------------------------------------------------------------------------------------------------------------------------------------------------------------------------------------------------------------------------------------------------------------------------------------------------------------------------------------------------------------------------------------------------------------------------------------------------------------------------------------------------------------------------------------------------------------------------------------------------------------------------------------------------------------------------------------------------------------------------------------------------------------------------------------------------------------------------------------------------------------------------------------|-------------------|-------------------------|----------------|----------|------------------------|-----------------|----------------|----------|
|                                                                                                                                                                                                                                                                                                                                                                                                                                                                                                                                                                                                                                                                                                                                                                                                                                                                                                                                                                                                                                                                                                                                                                          |                   | <b>&lt;=24 months</b>   |                |          | <b>&gt;24 months</b>   |                 |                |          |
| <b>Dependent Variable</b>                                                                                                                                                                                                                                                                                                                                                                                                                                                                                                                                                                                                                                                                                                                                                                                                                                                                                                                                                                                                                                                                                                                                                |                   | <b>Estimate</b>         | <b>95% CI</b>  | <b>N</b> |                        | <b>Estimate</b> | <b>95% CI</b>  | <b>N</b> |
| Child Outcomes (parent-reports)                                                                                                                                                                                                                                                                                                                                                                                                                                                                                                                                                                                                                                                                                                                                                                                                                                                                                                                                                                                                                                                                                                                                          |                   |                         |                |          |                        |                 |                |          |
| <i>BMI z-score</i>                                                                                                                                                                                                                                                                                                                                                                                                                                                                                                                                                                                                                                                                                                                                                                                                                                                                                                                                                                                                                                                                                                                                                       | <i>beta coeff</i> | -0.01                   | (-0.03 - 0.01) | 488      |                        | 0.02***         | (0.01 - 0.03)  | 800      |
| <i>Overweight or obese</i>                                                                                                                                                                                                                                                                                                                                                                                                                                                                                                                                                                                                                                                                                                                                                                                                                                                                                                                                                                                                                                                                                                                                               | <i>AOR</i>        | 1.01                    | (0.95 - 1.08)  | 488      |                        | 1.06***         | (1.02 - 1.10)  | 800      |
| <i>Obese</i>                                                                                                                                                                                                                                                                                                                                                                                                                                                                                                                                                                                                                                                                                                                                                                                                                                                                                                                                                                                                                                                                                                                                                             | <i>AOR</i>        | 0.94*                   | (0.88 - 1.00)  | 488      |                        | 1.05            | (0.99 - 1.12)  | 800      |
| <b>PANEL B: By On- Versus Off-Installation Residence</b>                                                                                                                                                                                                                                                                                                                                                                                                                                                                                                                                                                                                                                                                                                                                                                                                                                                                                                                                                                                                                                                                                                                 |                   |                         |                |          |                        |                 |                |          |
|                                                                                                                                                                                                                                                                                                                                                                                                                                                                                                                                                                                                                                                                                                                                                                                                                                                                                                                                                                                                                                                                                                                                                                          |                   | <b>Off-Installation</b> |                |          | <b>On-Installation</b> |                 |                |          |
| <b>Dependent Variable</b>                                                                                                                                                                                                                                                                                                                                                                                                                                                                                                                                                                                                                                                                                                                                                                                                                                                                                                                                                                                                                                                                                                                                                |                   | <b>Estimate</b>         | <b>95% CI</b>  | <b>N</b> |                        | <b>Estimate</b> | <b>95% CI</b>  | <b>N</b> |
| Child Outcomes (parent-reports)                                                                                                                                                                                                                                                                                                                                                                                                                                                                                                                                                                                                                                                                                                                                                                                                                                                                                                                                                                                                                                                                                                                                          |                   |                         |                |          |                        |                 |                |          |
| <i>BMI z-score</i>                                                                                                                                                                                                                                                                                                                                                                                                                                                                                                                                                                                                                                                                                                                                                                                                                                                                                                                                                                                                                                                                                                                                                       | <i>beta coeff</i> | 0.01                    | (-0.01 - 0.02) | 718      |                        | 0.00            | (-0.01 - 0.01) | 570      |
| <i>Overweight or obese</i>                                                                                                                                                                                                                                                                                                                                                                                                                                                                                                                                                                                                                                                                                                                                                                                                                                                                                                                                                                                                                                                                                                                                               | <i>AOR</i>        | 1.05***                 | (1.02 - 1.08)  | 718      |                        | 1.03            | (0.996 - 1.07) | 570      |
| <i>Obese</i>                                                                                                                                                                                                                                                                                                                                                                                                                                                                                                                                                                                                                                                                                                                                                                                                                                                                                                                                                                                                                                                                                                                                                             | <i>AOR</i>        | 1.04*                   | (1.00 - 1.10)  | 718      |                        | 0.95            | (0.90 - 1.002) | 570      |
| Notes: beta coeff: linear regression coefficient; AOR: Adjusted Odds Ratio. * p<0.10, ** p<0.05, *** p<0.01<br>All regressions control for installation county obesity rate; respondent's age, gender, and race/ethnicity (non-Hispanic white, non-Hispanic black, Hispanic/Latino, Other); parent's marital status, highest education level among child's parents (High school or less; trade, technical or some college; Associate degree or equivalent; 4 year college or higher), military parent's rank (Corporal/Specialist or lower; Sergeant; Staff Sergeant; Sergeant First Class; Master Sergeant/First Sergeant or higher); household income (<=\$40,000; \$40,001-\$50,000; \$50,001-\$85,000; \$85,001 or higher), number of children in the household (1, 2 and 3 or more), on-installation residence, and months at current installation (<=12, 13-24, 25-48 and >=49).<br>Reference Categories: Male, White non-Hispanic, living off-installation, non-military parent respondent, unmarried, rank Corporal/Specialist or less, less than high school degree, household income<=40,000, one child in household, and at current installation <=12 months. |                   |                         |                |          |                        |                 |                |          |

**eTable 10.** Association Between County Obesity Rate and Child’s BMI, Overweight and Obesity, Controlling for Shared Built Environment in the County and in the Neighborhood

|                                                                                                                                                                                                                                                                                                                                                                                                                                                                                                                                                                                                                                                                                                                                                                                                                                                                                                                                                                                                                                                                                                                                                                                                                                                                                                                                                                                                                                                                                                                                                                                                                                                                                                           |                         | Controlling for County FPA Environment <sup>a</sup> |                |       | Controlling for Neighborhood FPA Environment <sup>b</sup> |                |       |
|-----------------------------------------------------------------------------------------------------------------------------------------------------------------------------------------------------------------------------------------------------------------------------------------------------------------------------------------------------------------------------------------------------------------------------------------------------------------------------------------------------------------------------------------------------------------------------------------------------------------------------------------------------------------------------------------------------------------------------------------------------------------------------------------------------------------------------------------------------------------------------------------------------------------------------------------------------------------------------------------------------------------------------------------------------------------------------------------------------------------------------------------------------------------------------------------------------------------------------------------------------------------------------------------------------------------------------------------------------------------------------------------------------------------------------------------------------------------------------------------------------------------------------------------------------------------------------------------------------------------------------------------------------------------------------------------------------------|-------------------------|-----------------------------------------------------|----------------|-------|-----------------------------------------------------------|----------------|-------|
| Dependent Variable                                                                                                                                                                                                                                                                                                                                                                                                                                                                                                                                                                                                                                                                                                                                                                                                                                                                                                                                                                                                                                                                                                                                                                                                                                                                                                                                                                                                                                                                                                                                                                                                                                                                                        |                         | Estimate                                            | 95% CI         | N     | Estimate                                                  | 95% CI         | N     |
| Child Outcomes (parent-reports)                                                                                                                                                                                                                                                                                                                                                                                                                                                                                                                                                                                                                                                                                                                                                                                                                                                                                                                                                                                                                                                                                                                                                                                                                                                                                                                                                                                                                                                                                                                                                                                                                                                                           |                         |                                                     |                |       |                                                           |                |       |
| <i>BMI z-score</i>                                                                                                                                                                                                                                                                                                                                                                                                                                                                                                                                                                                                                                                                                                                                                                                                                                                                                                                                                                                                                                                                                                                                                                                                                                                                                                                                                                                                                                                                                                                                                                                                                                                                                        | <i>beta coefficient</i> | 0.01                                                | (-0.00 - 0.02) | 1,288 | 0.01*                                                     | (-0.00 - 0.02) | 1,271 |
| <i>Overweight or obese</i>                                                                                                                                                                                                                                                                                                                                                                                                                                                                                                                                                                                                                                                                                                                                                                                                                                                                                                                                                                                                                                                                                                                                                                                                                                                                                                                                                                                                                                                                                                                                                                                                                                                                                | <i>AOR</i>              | 1.03**                                              | (1.01 - 1.06)  | 1,288 | 1.04**                                                    | (1.01 - 1.07)  | 1,271 |
| <i>Obese</i>                                                                                                                                                                                                                                                                                                                                                                                                                                                                                                                                                                                                                                                                                                                                                                                                                                                                                                                                                                                                                                                                                                                                                                                                                                                                                                                                                                                                                                                                                                                                                                                                                                                                                              | <i>AOR</i>              | 0.99                                                | (0.95 - 1.03)  | 1,288 | 1.00                                                      | (0.97 - 1.03)  | 1,271 |
| <p>Notes: beta coeff: linear regression coefficient; AOR: Adjusted Odds Ratio. FPA: Food and Physical Activity. * p&lt;0.10, ** p&lt;0.05, *** p&lt;0.01</p> <p>All regressions control for installation county obesity rate; respondent’s age, gender, and race/ethnicity (non-Hispanic white, non-Hispanic black, Hispanic/Latino, Other); parent’s marital status, highest education level among child’s parents (High school or less; trade, technical or some college; Associate degree or equivalent; 4 year college or higher), military parent’s rank (Corporal/Specialist or lower; Sergeant; Staff Sergeant; Sergeant First Class; Master Sergeant/First Sergeant or higher); household income (&lt;=\$40,000; \$40,001-\$50,000; \$50,001-\$85,000; \$85,001 or higher), number of children in the household (1, 2 and 3 or more), on-installation residence, and months at current installation (&lt;=12, 13-24, 25-48 and &gt;=49).</p> <p>Reference Categories: Male, White non-Hispanic, living off-Installation, non-military parent respondent, unmarried, rank Corporal/Specialist or less, less than high school degree, household income&lt;=40,000, one child in household, and at current installation &lt;=12 months.</p> <p><sup>a</sup>County FPA measures included % of county population that lives close to a park or recreational facility and % of county population that is low-income and does not live close to a grocery store). <sup>b</sup>Neighborhood FPA measures included GIS-based measures of number of grocery stores, sports and recreational facilities, and intersections within a 2 miles buffer of residence, as well as the subjective NEWS-Y score.</p> |                         |                                                     |                |       |                                                           |                |       |

**eTable 11.** Relationship Between County Obesity Rate and Parent’s and Child’s BMI, Overweight and Obesity with Controls for Military Occupation

| Dependent Variable                                                                                                                                                                                                                                                                                                                                                                                                                                                                                                                                                                                                                                                                                                                                                                                                                                                                                                                                                                                                                                                                                                                                                                                                              |             | Estimate | 95% CI        | N     |  |
|---------------------------------------------------------------------------------------------------------------------------------------------------------------------------------------------------------------------------------------------------------------------------------------------------------------------------------------------------------------------------------------------------------------------------------------------------------------------------------------------------------------------------------------------------------------------------------------------------------------------------------------------------------------------------------------------------------------------------------------------------------------------------------------------------------------------------------------------------------------------------------------------------------------------------------------------------------------------------------------------------------------------------------------------------------------------------------------------------------------------------------------------------------------------------------------------------------------------------------|-------------|----------|---------------|-------|--|
| <b>Parent Outcomes</b> (from self-reported hgt/wgt)                                                                                                                                                                                                                                                                                                                                                                                                                                                                                                                                                                                                                                                                                                                                                                                                                                                                                                                                                                                                                                                                                                                                                                             |             |          |               |       |  |
| <i>BMI</i>                                                                                                                                                                                                                                                                                                                                                                                                                                                                                                                                                                                                                                                                                                                                                                                                                                                                                                                                                                                                                                                                                                                                                                                                                      | <i>beta</i> | 0.08***  | (0.02 - 0.13) | 1,258 |  |
| <i>Overweight or obese</i>                                                                                                                                                                                                                                                                                                                                                                                                                                                                                                                                                                                                                                                                                                                                                                                                                                                                                                                                                                                                                                                                                                                                                                                                      | <i>AOR</i>  | 1.00     | (0.98 - 1.03) | 1,253 |  |
| <i>Obese</i>                                                                                                                                                                                                                                                                                                                                                                                                                                                                                                                                                                                                                                                                                                                                                                                                                                                                                                                                                                                                                                                                                                                                                                                                                    | <i>AOR</i>  | 1.05***  | (1.03 - 1.08) | 1,250 |  |
| <b>Child Outcomes</b> (from self-reported hgt/wgt)                                                                                                                                                                                                                                                                                                                                                                                                                                                                                                                                                                                                                                                                                                                                                                                                                                                                                                                                                                                                                                                                                                                                                                              |             |          |               |       |  |
| <i>BMI z-score</i>                                                                                                                                                                                                                                                                                                                                                                                                                                                                                                                                                                                                                                                                                                                                                                                                                                                                                                                                                                                                                                                                                                                                                                                                              | <i>beta</i> | 0.01***  | (0.00 - 0.02) | 1,057 |  |
| <i>Overweight or obese</i>                                                                                                                                                                                                                                                                                                                                                                                                                                                                                                                                                                                                                                                                                                                                                                                                                                                                                                                                                                                                                                                                                                                                                                                                      | <i>AOR</i>  | 1.03***  | (1.01 - 1.05) | 1,040 |  |
| <i>Obese</i>                                                                                                                                                                                                                                                                                                                                                                                                                                                                                                                                                                                                                                                                                                                                                                                                                                                                                                                                                                                                                                                                                                                                                                                                                    | <i>AOR</i>  | 1.02     | (0.99 - 1.04) | 1,042 |  |
| <p>Notes: beta coeff: linear regression coefficient; AOR: Adjusted Odds Ratio. * p&lt;0.10, ** p&lt;0.05, *** p&lt;0.01<br/>           All regressions control for installation county obesity rate; respondent’s age, gender, and race/ethnicity (non-Hispanic white, non-Hispanic black, Hispanic/Latino, Other); parent’s marital status, highest education level among child’s parents (High school or less; trade, technical or some college; Associate degree or equivalent; 4 year college or higher), military parent’s rank (Corporal/Specialist or lower; Sergeant; Staff Sergeant; Sergeant First Class; Master Sergeant/First Sergeant or higher); household income (&lt;=\$40,000; \$40,001-\$50,000; \$50,001-\$85,000; \$85,001 or higher), number of children in the household (1, 2 and 3 or more), on-installation residence, and months at current installation (&lt;=12, 13-24, 25-48 and &gt;=49).<br/>           Reference Categories: Male, White non-Hispanic, living off-Installation, non-military parent respondent, unmarried, rank Corporal/Specialist or less, less than high school degree, household income&lt;=40,000, one child in household, and at current installation &lt;=12 months.</p> |             |          |               |       |  |
| <p>Occupation categories include: Administration, Infantry, Law Enforcement, Legal Services, Medical, Psychological, Operations, Public Affairs, Recruiting and Retention, Religious Services, Signals (Communications), Air Defense, Special Forces, Supply and Logistics, Transportation, Armor, Aviation, Chemical Warfare, Civil Affairs, Electronic Maintenance, Explosives and Ammunition, Field Artillery, Other.</p>                                                                                                                                                                                                                                                                                                                                                                                                                                                                                                                                                                                                                                                                                                                                                                                                    |             |          |               |       |  |

**eTable 12.** Relationship Between County Obesity Rate and Parent’s and Child’s BMI, Overweight and Obesity with Controls for Seniority

| Dependent Variable                                                                                                                                                                                                                                                                                                                                                                                                                                                                                                                                                                                                                                                                                                                                                                                                                                                                                                                                                                                                                                                                                                                                                                                                                                                |             | Estimate | 95% CI        | N     |  |
|-------------------------------------------------------------------------------------------------------------------------------------------------------------------------------------------------------------------------------------------------------------------------------------------------------------------------------------------------------------------------------------------------------------------------------------------------------------------------------------------------------------------------------------------------------------------------------------------------------------------------------------------------------------------------------------------------------------------------------------------------------------------------------------------------------------------------------------------------------------------------------------------------------------------------------------------------------------------------------------------------------------------------------------------------------------------------------------------------------------------------------------------------------------------------------------------------------------------------------------------------------------------|-------------|----------|---------------|-------|--|
| <b>Parent Outcomes</b> (from self-reported hgt/wgt)                                                                                                                                                                                                                                                                                                                                                                                                                                                                                                                                                                                                                                                                                                                                                                                                                                                                                                                                                                                                                                                                                                                                                                                                               |             |          |               |       |  |
| <i>BMI</i>                                                                                                                                                                                                                                                                                                                                                                                                                                                                                                                                                                                                                                                                                                                                                                                                                                                                                                                                                                                                                                                                                                                                                                                                                                                        | <i>beta</i> | 0.08***  | (0.03 - 0.13) | 1,314 |  |
| <i>Overweight or obese</i>                                                                                                                                                                                                                                                                                                                                                                                                                                                                                                                                                                                                                                                                                                                                                                                                                                                                                                                                                                                                                                                                                                                                                                                                                                        | <i>AOR</i>  | 1.00     | (0.98 - 1.03) | 1,314 |  |
| <i>Obese</i>                                                                                                                                                                                                                                                                                                                                                                                                                                                                                                                                                                                                                                                                                                                                                                                                                                                                                                                                                                                                                                                                                                                                                                                                                                                      | <i>AOR</i>  | 1.05***  | (1.02 - 1.08) | 1,314 |  |
| <b>Child Outcomes</b> (from self-reported hgt/wgt)                                                                                                                                                                                                                                                                                                                                                                                                                                                                                                                                                                                                                                                                                                                                                                                                                                                                                                                                                                                                                                                                                                                                                                                                                |             |          |               |       |  |
| <i>BMI z-score</i>                                                                                                                                                                                                                                                                                                                                                                                                                                                                                                                                                                                                                                                                                                                                                                                                                                                                                                                                                                                                                                                                                                                                                                                                                                                | <i>beta</i> | 0.01***  | (0.00 - 0.02) | 1,111 |  |
| <i>Overweight or obese</i>                                                                                                                                                                                                                                                                                                                                                                                                                                                                                                                                                                                                                                                                                                                                                                                                                                                                                                                                                                                                                                                                                                                                                                                                                                        | <i>AOR</i>  | 1.04***  | (1.01 - 1.06) | 1,111 |  |
| <i>Obese</i>                                                                                                                                                                                                                                                                                                                                                                                                                                                                                                                                                                                                                                                                                                                                                                                                                                                                                                                                                                                                                                                                                                                                                                                                                                                      | <i>AOR</i>  | 1.01     | (0.99 - 1.04) | 1,111 |  |
| <p>Notes: beta coeff: linear regression coefficient; AOR: Adjusted Odds Ratio. * p&lt;0.10, ** p&lt;0.05, *** p&lt;0.01<br/>           All regressions control for installation county obesity rate; respondent’s age, gender, and race/ethnicity (non-Hispanic white, non-Hispanic black, Hispanic/Latino, Other); parent’s marital status, highest education level among child’s parents (High school or less; trade, technical or some college; Associate degree or equivalent; 4 year college or higher), military parent’s rank (Corporal/Specialist or lower; Sergeant; Staff Sergeant; Sergeant First Class; Master Sergeant/First Sergeant or higher); household income (&lt;=\$40,000; \$40,001-\$50,000; \$50,001-\$85,000; \$85,001 or higher), number of children in the household (1, 2 and 3 or more), on-installation residence, and months at current installation (&lt;=12, 13-24, 25-48 and &gt;=49), and seniority (years of service).<br/>           Reference Categories: Male, White non-Hispanic, living off-Installation, non-military parent respondent, unmarried, rank Corporal/Specialist or less, less than high school degree, household income&lt;=40,000, one child in household, and at current installation &lt;=12 months.</p> |             |          |               |       |  |

**eTable 13.** Relationship Between County Obesity Rate and Parent’s and Child’s BMI, Overweight and Obesity, by Length of Stay at Installation (Using 12 Month Cutoff)

|                                                                                                                                                                                                                                                                                                                                                                                                                                                                                                                                                                                                                                                                                                                                                                                                                                                                                                                                                                                                                                                                                                                                 |             | Length of Stay at Current Installation |                |     |            |               |       |
|---------------------------------------------------------------------------------------------------------------------------------------------------------------------------------------------------------------------------------------------------------------------------------------------------------------------------------------------------------------------------------------------------------------------------------------------------------------------------------------------------------------------------------------------------------------------------------------------------------------------------------------------------------------------------------------------------------------------------------------------------------------------------------------------------------------------------------------------------------------------------------------------------------------------------------------------------------------------------------------------------------------------------------------------------------------------------------------------------------------------------------|-------------|----------------------------------------|----------------|-----|------------|---------------|-------|
|                                                                                                                                                                                                                                                                                                                                                                                                                                                                                                                                                                                                                                                                                                                                                                                                                                                                                                                                                                                                                                                                                                                                 |             | <=12 months                            |                |     | >12 months |               |       |
| Dependent Variable                                                                                                                                                                                                                                                                                                                                                                                                                                                                                                                                                                                                                                                                                                                                                                                                                                                                                                                                                                                                                                                                                                              |             | Est.                                   | 95% CI         | N   | Est.       | 95% CI        | N     |
| <b>Parent Outcomes</b> (from self-reported hgt/wgt)                                                                                                                                                                                                                                                                                                                                                                                                                                                                                                                                                                                                                                                                                                                                                                                                                                                                                                                                                                                                                                                                             |             |                                        |                |     |            |               |       |
| <i>BMI</i>                                                                                                                                                                                                                                                                                                                                                                                                                                                                                                                                                                                                                                                                                                                                                                                                                                                                                                                                                                                                                                                                                                                      | <i>beta</i> | -0.01                                  | (-0.17 - 0.14) | 140 | 0.08**     | (0.02 - 0.15) | 1,174 |
| <i>Overweight or obese</i>                                                                                                                                                                                                                                                                                                                                                                                                                                                                                                                                                                                                                                                                                                                                                                                                                                                                                                                                                                                                                                                                                                      | <i>AOR</i>  | 0.97                                   | (0.90 - 1.05)  | 140 | 1.00       | (0.98 - 1.03) | 1,174 |
| <i>Obese</i>                                                                                                                                                                                                                                                                                                                                                                                                                                                                                                                                                                                                                                                                                                                                                                                                                                                                                                                                                                                                                                                                                                                    | <i>AOR</i>  | 0.99                                   | (0.84 - 1.16)  | 140 | 1.05***    | (1.02 - 1.08) | 1,174 |
| <b>Child Outcomes</b> (from self-reported hgt/wgt)                                                                                                                                                                                                                                                                                                                                                                                                                                                                                                                                                                                                                                                                                                                                                                                                                                                                                                                                                                                                                                                                              |             |                                        |                |     |            |               |       |
| <i>BMI z-score</i>                                                                                                                                                                                                                                                                                                                                                                                                                                                                                                                                                                                                                                                                                                                                                                                                                                                                                                                                                                                                                                                                                                              | <i>beta</i> | 0.02                                   | (-0.04 - 0.07) | 120 | 0.01***    | (0.00 - 0.02) | 991   |
| <i>Overweight or obese</i>                                                                                                                                                                                                                                                                                                                                                                                                                                                                                                                                                                                                                                                                                                                                                                                                                                                                                                                                                                                                                                                                                                      | <i>AOR</i>  | 1.00                                   | (0.86 - 1.17)  | 107 | 1.04***    | (1.02 - 1.06) | 991   |
| <i>Obese</i>                                                                                                                                                                                                                                                                                                                                                                                                                                                                                                                                                                                                                                                                                                                                                                                                                                                                                                                                                                                                                                                                                                                    | <i>AOR</i>  | 1.08                                   | (0.91 - 1.28)  | 90  | 1.02       | (0.98 - 1.05) | 991   |
| Notes: beta coeff: linear regression coefficient; AOR: Adjusted Odds Ratio. * p<0.10, ** p<0.05, *** p<0.01<br>All regressions control for installation county obesity rate; respondent’s age, gender, and race/ethnicity (non-Hispanic white, non-Hispanic black, Hispanic/Latino, Other); parent’s marital status, highest education level among child’s parents (High school or less; trade, technical or some college; Associate degree or equivalent; 4 year college or higher), military parent’s rank (Corporal/Specialist or lower; Sergeant; Staff Sergeant; Sergeant First Class; Master Sergeant/First Sergeant or higher); household income (<=\$40,000; \$40,001-\$50,000; \$50,001-\$85,000; \$85,001 or higher), number of children in the household (1, 2 and 3 or more), on-installation residence, and months at current installation (<=12, 13-24, 25-48 and >=49).<br>Reference Categories: Male, White non-Hispanic, living off-Installation, non-military parent respondent, unmarried, rank Corporal/Specialist or less, less than high school degree, household income<=40,000, one child in household. |             |                                        |                |     |            |               |       |



**eTable 14.** Relationship Between County Obesity Rate and Parent’s and Child’s BMI, Overweight and Obesity, by Length of Stay at Installation (Using 18 Month Cutoff)

|                                                                                                                                                                                                                                                                                                                                                                                                                                                                                                                                                                                                                                                                                                                                                                                                                                                                                                                                                                                                                                                                                                                                 |             | Length of Stay at Current Installation |                |     |            |               |       |
|---------------------------------------------------------------------------------------------------------------------------------------------------------------------------------------------------------------------------------------------------------------------------------------------------------------------------------------------------------------------------------------------------------------------------------------------------------------------------------------------------------------------------------------------------------------------------------------------------------------------------------------------------------------------------------------------------------------------------------------------------------------------------------------------------------------------------------------------------------------------------------------------------------------------------------------------------------------------------------------------------------------------------------------------------------------------------------------------------------------------------------|-------------|----------------------------------------|----------------|-----|------------|---------------|-------|
|                                                                                                                                                                                                                                                                                                                                                                                                                                                                                                                                                                                                                                                                                                                                                                                                                                                                                                                                                                                                                                                                                                                                 |             | <=18 months                            |                |     | >18 months |               |       |
| Dependent Variable                                                                                                                                                                                                                                                                                                                                                                                                                                                                                                                                                                                                                                                                                                                                                                                                                                                                                                                                                                                                                                                                                                              |             | Est.                                   | 95% CI         | N   | Est.       | 95% CI        | N     |
| <b>Parent Outcomes</b> (from self-reported hgt/wgt)                                                                                                                                                                                                                                                                                                                                                                                                                                                                                                                                                                                                                                                                                                                                                                                                                                                                                                                                                                                                                                                                             |             |                                        |                |     |            |               |       |
| <i>BMI</i>                                                                                                                                                                                                                                                                                                                                                                                                                                                                                                                                                                                                                                                                                                                                                                                                                                                                                                                                                                                                                                                                                                                      | <i>beta</i> | 0.02                                   | (-0.08 - 0.13) | 204 | 0.08**     | (0.02 - 0.15) | 1,110 |
| <i>Overweight or obese</i>                                                                                                                                                                                                                                                                                                                                                                                                                                                                                                                                                                                                                                                                                                                                                                                                                                                                                                                                                                                                                                                                                                      | <i>AOR</i>  | 0.98                                   | (0.92 - 1.04)  | 204 | 1.00       | (0.98 - 1.03) | 1,110 |
| <i>Obese</i>                                                                                                                                                                                                                                                                                                                                                                                                                                                                                                                                                                                                                                                                                                                                                                                                                                                                                                                                                                                                                                                                                                                    | <i>AOR</i>  | 1.05                                   | (0.96 - 1.14)  | 204 | 1.05***    | (1.02 - 1.08) | 1,110 |
| <b>Child Outcomes</b> (from self-reported hgt/wgt)                                                                                                                                                                                                                                                                                                                                                                                                                                                                                                                                                                                                                                                                                                                                                                                                                                                                                                                                                                                                                                                                              |             |                                        |                |     |            |               |       |
| <i>BMI z-score</i>                                                                                                                                                                                                                                                                                                                                                                                                                                                                                                                                                                                                                                                                                                                                                                                                                                                                                                                                                                                                                                                                                                              | <i>beta</i> | 0.01                                   | (-0.03 - 0.06) | 174 | 0.01**     | (0.00 - 0.02) | 937   |
| <i>Overweight or obese</i>                                                                                                                                                                                                                                                                                                                                                                                                                                                                                                                                                                                                                                                                                                                                                                                                                                                                                                                                                                                                                                                                                                      | <i>AOR</i>  | 1.03                                   | (0.90 - 1.18)  | 174 | 1.04***    | (1.02 - 1.06) | 937   |
| <i>Obese</i>                                                                                                                                                                                                                                                                                                                                                                                                                                                                                                                                                                                                                                                                                                                                                                                                                                                                                                                                                                                                                                                                                                                    | <i>AOR</i>  | 1.07                                   | (0.94 - 1.22)  | 134 | 1.01       | (0.97 - 1.05) | 937   |
| Notes: beta coeff: linear regression coefficient; AOR: Adjusted Odds Ratio. * p<0.10, ** p<0.05, *** p<0.01<br>All regressions control for installation county obesity rate; respondent’s age, gender, and race/ethnicity (non-Hispanic white, non-Hispanic black, Hispanic/Latino, Other); parent’s marital status, highest education level among child’s parents (High school or less; trade, technical or some college; Associate degree or equivalent; 4 year college or higher), military parent’s rank (Corporal/Specialist or lower; Sergeant; Staff Sergeant; Sergeant First Class; Master Sergeant/First Sergeant or higher); household income (<=\$40,000; \$40,001-\$50,000; \$50,001-\$85,000; \$85,001 or higher), number of children in the household (1, 2 and 3 or more), on-installation residence, and months at current installation (<=12, 13-24, 25-48 and >=49).<br>Reference Categories: Male, White non-Hispanic, living off-Installation, non-military parent respondent, unmarried, rank Corporal/Specialist or less, less than high school degree, household income<=40,000, one child in household. |             |                                        |                |     |            |               |       |

**eTable 15.** Relationship Between County Obesity Rate and Parent’s and Child’s BMI, Overweight and Obesity, by Length of Stay at Installation (Using 30 Month Cutoff)

| Dependent Variable                                                                                                                                                                                                                                                                                                                                                                                                                                                                                                                                                                                                                                                                                                                                                                                                                                                                                                                                                                                                                                                                                                              |             | Length of Stay at Current Installation |                |     |            |               |     |
|---------------------------------------------------------------------------------------------------------------------------------------------------------------------------------------------------------------------------------------------------------------------------------------------------------------------------------------------------------------------------------------------------------------------------------------------------------------------------------------------------------------------------------------------------------------------------------------------------------------------------------------------------------------------------------------------------------------------------------------------------------------------------------------------------------------------------------------------------------------------------------------------------------------------------------------------------------------------------------------------------------------------------------------------------------------------------------------------------------------------------------|-------------|----------------------------------------|----------------|-----|------------|---------------|-----|
|                                                                                                                                                                                                                                                                                                                                                                                                                                                                                                                                                                                                                                                                                                                                                                                                                                                                                                                                                                                                                                                                                                                                 |             | <=30 months                            |                |     | >30 months |               |     |
|                                                                                                                                                                                                                                                                                                                                                                                                                                                                                                                                                                                                                                                                                                                                                                                                                                                                                                                                                                                                                                                                                                                                 |             | Est.                                   | 95% CI         | N   | Est.       | 95% CI        | N   |
| <b>Parent Outcomes</b> (from self-reported hgt/wgt)                                                                                                                                                                                                                                                                                                                                                                                                                                                                                                                                                                                                                                                                                                                                                                                                                                                                                                                                                                                                                                                                             |             |                                        |                |     |            |               |     |
| <i>BMI</i>                                                                                                                                                                                                                                                                                                                                                                                                                                                                                                                                                                                                                                                                                                                                                                                                                                                                                                                                                                                                                                                                                                                      | <i>beta</i> | 0.07                                   | (0.00 - 0.13)  | 680 | 0.09*      | (0.01 - 0.16) | 634 |
| <i>Overweight or obese</i>                                                                                                                                                                                                                                                                                                                                                                                                                                                                                                                                                                                                                                                                                                                                                                                                                                                                                                                                                                                                                                                                                                      | <i>AOR</i>  | 1.01                                   | (0.98 - 1.04)  | 680 | 1.00       | (0.96 - 1.03) | 634 |
| <i>Obese</i>                                                                                                                                                                                                                                                                                                                                                                                                                                                                                                                                                                                                                                                                                                                                                                                                                                                                                                                                                                                                                                                                                                                    | <i>AOR</i>  | 1.06**                                 | (1.00 - 1.11)  | 680 | 1.04**     | (1.00 - 1.08) | 634 |
| <b>Child Outcomes</b> (from self-reported hgt/wgt)                                                                                                                                                                                                                                                                                                                                                                                                                                                                                                                                                                                                                                                                                                                                                                                                                                                                                                                                                                                                                                                                              |             |                                        |                |     |            |               |     |
| <i>BMI z-score</i>                                                                                                                                                                                                                                                                                                                                                                                                                                                                                                                                                                                                                                                                                                                                                                                                                                                                                                                                                                                                                                                                                                              | <i>beta</i> | -0.01                                  | (-0.02 - 0.01) | 580 | 0.04***    | (0.02 - 0.05) | 531 |
| <i>Overweight or obese</i>                                                                                                                                                                                                                                                                                                                                                                                                                                                                                                                                                                                                                                                                                                                                                                                                                                                                                                                                                                                                                                                                                                      | <i>AOR</i>  | 1.01                                   | (0.95 - 1.07)  | 580 | 1.08***    | (1.05 - 1.11) | 531 |
| <i>Obese</i>                                                                                                                                                                                                                                                                                                                                                                                                                                                                                                                                                                                                                                                                                                                                                                                                                                                                                                                                                                                                                                                                                                                    | <i>AOR</i>  | 0.99                                   | (0.94 - 1.04)  | 580 | 1.06*      | (1.03 - 1.10) | 531 |
| Notes: beta coeff: linear regression coefficient; AOR: Adjusted Odds Ratio. * p<0.10, ** p<0.05, *** p<0.01<br>All regressions control for installation county obesity rate; respondent’s age, gender, and race/ethnicity (non-Hispanic white, non-Hispanic black, Hispanic/Latino, Other); parent’s marital status, highest education level among child’s parents (High school or less; trade, technical or some college; Associate degree or equivalent; 4 year college or higher), military parent’s rank (Corporal/Specialist or lower; Sergeant; Staff Sergeant; Sergeant First Class; Master Sergeant/First Sergeant or higher); household income (<=\$40,000; \$40,001-\$50,000; \$50,001-\$85,000; \$85,001 or higher), number of children in the household (1, 2 and 3 or more), on-installation residence, and months at current installation (<=12, 13-24, 25-48 and >=49).<br>Reference Categories: Male, White non-Hispanic, living off-Installation, non-military parent respondent, unmarried, rank Corporal/Specialist or less, less than high school degree, household income<=40,000, one child in household. |             |                                        |                |     |            |               |     |

**eTable 16.** Association Between County Obesity Rate and Child’s BMI, Overweight, and Obesity Using Regression-Corrected Outcomes

| Dependent Variable                                                                                                                                                                                                                                                                                                                                                                                                                                                                                                                                                                                                                                                                                                                                                                                                                                                                                                                                                                                                                                                                                                                                                       |             | Adjusted |                |       | Unadjusted |                |       |
|--------------------------------------------------------------------------------------------------------------------------------------------------------------------------------------------------------------------------------------------------------------------------------------------------------------------------------------------------------------------------------------------------------------------------------------------------------------------------------------------------------------------------------------------------------------------------------------------------------------------------------------------------------------------------------------------------------------------------------------------------------------------------------------------------------------------------------------------------------------------------------------------------------------------------------------------------------------------------------------------------------------------------------------------------------------------------------------------------------------------------------------------------------------------------|-------------|----------|----------------|-------|------------|----------------|-------|
|                                                                                                                                                                                                                                                                                                                                                                                                                                                                                                                                                                                                                                                                                                                                                                                                                                                                                                                                                                                                                                                                                                                                                                          |             | Est.     | 95% CI         | N     | Est.       | 95% CI         | N     |
| <b>Child Outcomes</b><br>(using “corrected” BMI)                                                                                                                                                                                                                                                                                                                                                                                                                                                                                                                                                                                                                                                                                                                                                                                                                                                                                                                                                                                                                                                                                                                         |             |          |                |       |            |                |       |
| <i>BMI z-score</i>                                                                                                                                                                                                                                                                                                                                                                                                                                                                                                                                                                                                                                                                                                                                                                                                                                                                                                                                                                                                                                                                                                                                                       | <i>beta</i> | 0.00     | (-0.01 - 0.01) | 1,316 | 0.00       | (-0.01 - 0.01) | 1,316 |
| <i>Overweight or obese</i>                                                                                                                                                                                                                                                                                                                                                                                                                                                                                                                                                                                                                                                                                                                                                                                                                                                                                                                                                                                                                                                                                                                                               | <i>AOR</i>  | 1.04***  | (1.01 - 1.07)  | 1,316 | 1.04**     | (1.01 - 1.07)  | 1,316 |
| <i>Obese</i>                                                                                                                                                                                                                                                                                                                                                                                                                                                                                                                                                                                                                                                                                                                                                                                                                                                                                                                                                                                                                                                                                                                                                             | <i>AOR</i>  | 1.02     | (0.99 - 1.05)  | 1,316 | 1.02       | (0.99 - 1.06)  | 1,316 |
| Notes: beta coeff: linear regression coefficient; AOR: Adjusted Odds Ratio. * p<0.10, ** p<0.05, *** p<0.01<br>All regressions control for installation county obesity rate; respondent’s age, gender, and race/ethnicity (non-Hispanic white, non-Hispanic black, Hispanic/Latino, Other); parent’s marital status, highest education level among child’s parents (High school or less; trade, technical or some college; Associate degree or equivalent; 4 year college or higher), military parent’s rank (Corporal/Specialist or lower; Sergeant; Staff Sergeant; Sergeant First Class; Master Sergeant/First Sergeant or higher); household income (<=\$40,000; \$40,001-\$50,000; \$50,001-\$85,000; \$85,001 or higher), number of children in the household (1, 2 and 3 or more), on-installation residence, and months at current installation (<=12, 13-24, 25-48 and >=49).<br>Reference Categories: Male, White non-Hispanic, living off-Installation, non-military parent respondent, unmarried, rank Corporal/Specialist or less, less than high school degree, household income<=40,000, one child in household, and at current installation <=12 months. |             |          |                |       |            |                |       |

We used the subsample of 458 children with measurements as a validation sample to correct measurement error in the reported height and weight of the children with no measurement data by estimating “correction models” that are a standard approach in the literature.<sup>17,18</sup> Details about our correction models are reported elsewhere<sup>19</sup>. Using the “corrected” height and weight, we computed age- and gender-specific BMI z-score (zBMI) and an indicator for overweight or obese (BMI percentile >=85<sup>th</sup>) based on the 2000 BMI-for-age and gender growth charts issued by the Centers for Disease Control and Prevention. Results using these “corrected” outcome measures were similar to those reported in Table 2 and are shown below.

**eTable 17.** Association Between County Obesity Rate and Other Child Body Composition Outcomes

| Dependent Variable                                                                                                                                                                                                                                                                                                                                                                                                                                                                                                                                                                                                                                                                                                                                                                                                                                                                                                                                                                                                                                                                                                                                                       |             | Results from Adjusted Models |                |     |
|--------------------------------------------------------------------------------------------------------------------------------------------------------------------------------------------------------------------------------------------------------------------------------------------------------------------------------------------------------------------------------------------------------------------------------------------------------------------------------------------------------------------------------------------------------------------------------------------------------------------------------------------------------------------------------------------------------------------------------------------------------------------------------------------------------------------------------------------------------------------------------------------------------------------------------------------------------------------------------------------------------------------------------------------------------------------------------------------------------------------------------------------------------------------------|-------------|------------------------------|----------------|-----|
|                                                                                                                                                                                                                                                                                                                                                                                                                                                                                                                                                                                                                                                                                                                                                                                                                                                                                                                                                                                                                                                                                                                                                                          |             | Est.                         | 95% CI         | N   |
| <b>Child Outcomes</b>                                                                                                                                                                                                                                                                                                                                                                                                                                                                                                                                                                                                                                                                                                                                                                                                                                                                                                                                                                                                                                                                                                                                                    |             |                              |                |     |
| <i>Waist Circumference</i>                                                                                                                                                                                                                                                                                                                                                                                                                                                                                                                                                                                                                                                                                                                                                                                                                                                                                                                                                                                                                                                                                                                                               | <i>beta</i> | 0.26                         | (-0.07 - 0.59) | 458 |
| <i>Body Fat Percent</i>                                                                                                                                                                                                                                                                                                                                                                                                                                                                                                                                                                                                                                                                                                                                                                                                                                                                                                                                                                                                                                                                                                                                                  | <i>beta</i> | 0.14                         | (-0.12 - 0.41) | 458 |
| <i>Waist-to-Height Ratio&gt;0.5</i>                                                                                                                                                                                                                                                                                                                                                                                                                                                                                                                                                                                                                                                                                                                                                                                                                                                                                                                                                                                                                                                                                                                                      | <i>AOR</i>  | 1.08*                        | (1.00 - 1.16)  | 458 |
| <i>Waist Circumference&gt;=90<sup>th</sup> percentile</i>                                                                                                                                                                                                                                                                                                                                                                                                                                                                                                                                                                                                                                                                                                                                                                                                                                                                                                                                                                                                                                                                                                                | <i>AOR</i>  | 1.02                         | (0.93 - 1.11)  | 458 |
| <i>High Body Fat: &gt;25% (boys), &gt;30% (girls)</i>                                                                                                                                                                                                                                                                                                                                                                                                                                                                                                                                                                                                                                                                                                                                                                                                                                                                                                                                                                                                                                                                                                                    | <i>AOR</i>  | 1.05*                        | (0.99 - 1.11)  | 458 |
| Notes: beta coeff: linear regression coefficient; AOR: Adjusted Odds Ratio. * p<0.10, ** p<0.05, *** p<0.01<br>All regressions control for installation county obesity rate; respondent's age, gender, and race/ethnicity (non-Hispanic white, non-Hispanic black, Hispanic/Latino, Other); parent's marital status, highest education level among child's parents (High school or less; trade, technical or some college; Associate degree or equivalent; 4 year college or higher), military parent's rank (Corporal/Specialist or lower; Sergeant; Staff Sergeant; Sergeant First Class; Master Sergeant/First Sergeant or higher); household income (<=\$40,000; \$40,001-\$50,000; \$50,001-\$85,000; \$85,001 or higher), number of children in the household (1, 2 and 3 or more), on-installation residence, and months at current installation (<=12, 13-24, 25-48 and >=49).<br>Reference Categories: Male, White non-Hispanic, living off-Installation, non-military parent respondent, unmarried, rank Corporal/Specialist or less, less than high school degree, household income<=40,000, one child in household, and at current installation <=12 months. |             |                              |                |     |

Other Body Composition Measures: Abdominal obesity was assessed as waist circumference (WC) at or above the 90th percentile for age and gender based on the NHANES III data from 1988-1994.<sup>1,2</sup> In addition, waist-to-height ratios (WHTR) were calculated as a second measure of abdominal obesity, and children with a WHTR > 0.5 were classified as obese.<sup>1,3</sup> Lastly, high body fat percentage was assessed as percent body fat > 25 for boys and percent body fat >30 for girls.<sup>4,5</sup>

**eTable 18.** Associations Between County Obesity Rate and Child’s and Parent’s Diet and Activity Behaviors and Home Environment

| Dependent Variable                                                                                                                                                                                                                                                                                                                                                                                                                                                                                                                                                                                                                                                                                                                                                                                                                                                                                                                                                                                                                                                                                                                                          | Model, Parameter | Estimate | 95% CI          | N     |
|-------------------------------------------------------------------------------------------------------------------------------------------------------------------------------------------------------------------------------------------------------------------------------------------------------------------------------------------------------------------------------------------------------------------------------------------------------------------------------------------------------------------------------------------------------------------------------------------------------------------------------------------------------------------------------------------------------------------------------------------------------------------------------------------------------------------------------------------------------------------------------------------------------------------------------------------------------------------------------------------------------------------------------------------------------------------------------------------------------------------------------------------------------------|------------------|----------|-----------------|-------|
| <b>Child-Reported Outcomes</b>                                                                                                                                                                                                                                                                                                                                                                                                                                                                                                                                                                                                                                                                                                                                                                                                                                                                                                                                                                                                                                                                                                                              |                  |          |                 |       |
| Total Physical Activity (Mins/week)                                                                                                                                                                                                                                                                                                                                                                                                                                                                                                                                                                                                                                                                                                                                                                                                                                                                                                                                                                                                                                                                                                                         | OLS, beta        | -3.15*** | (-5.38 - -0.92) | 1,117 |
| Vigorous Physical Activity (Mins/week)                                                                                                                                                                                                                                                                                                                                                                                                                                                                                                                                                                                                                                                                                                                                                                                                                                                                                                                                                                                                                                                                                                                      | OLS, beta        | -2.23*** | (-3.61 - -0.85) | 1,121 |
| Moderate Physical Activity (Mins/week)                                                                                                                                                                                                                                                                                                                                                                                                                                                                                                                                                                                                                                                                                                                                                                                                                                                                                                                                                                                                                                                                                                                      | OLS, beta        | -0.87    | (-2.24 - 0.51)  | 1,124 |
| Television watching (hours/week)                                                                                                                                                                                                                                                                                                                                                                                                                                                                                                                                                                                                                                                                                                                                                                                                                                                                                                                                                                                                                                                                                                                            | OLS, beta        | 0.06     | (-0.13 - 0.25)  | 1,120 |
| Videogames (hours/week)                                                                                                                                                                                                                                                                                                                                                                                                                                                                                                                                                                                                                                                                                                                                                                                                                                                                                                                                                                                                                                                                                                                                     | OLS, beta        | 0.02     | (-0.14 - 0.18)  | 1,115 |
| Times per week ate:                                                                                                                                                                                                                                                                                                                                                                                                                                                                                                                                                                                                                                                                                                                                                                                                                                                                                                                                                                                                                                                                                                                                         |                  |          |                 |       |
| Fruits and vegetables                                                                                                                                                                                                                                                                                                                                                                                                                                                                                                                                                                                                                                                                                                                                                                                                                                                                                                                                                                                                                                                                                                                                       | Poisson, IRR     | 1.00     | (0.99 - 1.01)   | 1112  |
| Soda                                                                                                                                                                                                                                                                                                                                                                                                                                                                                                                                                                                                                                                                                                                                                                                                                                                                                                                                                                                                                                                                                                                                                        | Poisson, IRR     | 0.99     | (0.97 - 1.01)   | 1,124 |
| Sweets                                                                                                                                                                                                                                                                                                                                                                                                                                                                                                                                                                                                                                                                                                                                                                                                                                                                                                                                                                                                                                                                                                                                                      | Poisson, IRR     | 1.01*    | (1.00 - 1.02)   | 1,091 |
| <b>Dependent Variable</b>                                                                                                                                                                                                                                                                                                                                                                                                                                                                                                                                                                                                                                                                                                                                                                                                                                                                                                                                                                                                                                                                                                                                   |                  |          |                 |       |
| <b>Model, Parameter</b>                                                                                                                                                                                                                                                                                                                                                                                                                                                                                                                                                                                                                                                                                                                                                                                                                                                                                                                                                                                                                                                                                                                                     |                  |          |                 |       |
| <b>Estimate</b>                                                                                                                                                                                                                                                                                                                                                                                                                                                                                                                                                                                                                                                                                                                                                                                                                                                                                                                                                                                                                                                                                                                                             |                  |          |                 |       |
| <b>95% CI</b>                                                                                                                                                                                                                                                                                                                                                                                                                                                                                                                                                                                                                                                                                                                                                                                                                                                                                                                                                                                                                                                                                                                                               |                  |          |                 |       |
| <b>N</b>                                                                                                                                                                                                                                                                                                                                                                                                                                                                                                                                                                                                                                                                                                                                                                                                                                                                                                                                                                                                                                                                                                                                                    |                  |          |                 |       |
| Salty Snacks                                                                                                                                                                                                                                                                                                                                                                                                                                                                                                                                                                                                                                                                                                                                                                                                                                                                                                                                                                                                                                                                                                                                                | Poisson, IRR     | 1.00     | (0.99 - 1.02)   | 1,110 |
| Fast food                                                                                                                                                                                                                                                                                                                                                                                                                                                                                                                                                                                                                                                                                                                                                                                                                                                                                                                                                                                                                                                                                                                                                   | Poisson, IRR     | 1.00     | (0.99 - 1.00)   | 1,127 |
| <b>Parent-Reported Outcomes</b>                                                                                                                                                                                                                                                                                                                                                                                                                                                                                                                                                                                                                                                                                                                                                                                                                                                                                                                                                                                                                                                                                                                             |                  |          |                 |       |
| Parent’s Total Physical Activity (Mins/week)                                                                                                                                                                                                                                                                                                                                                                                                                                                                                                                                                                                                                                                                                                                                                                                                                                                                                                                                                                                                                                                                                                                | OLS, beta        | -1.19    | (-3.20 - 0.82)  | 1,313 |
| Parent’s Vigorous Physical Activity (Mins/week)                                                                                                                                                                                                                                                                                                                                                                                                                                                                                                                                                                                                                                                                                                                                                                                                                                                                                                                                                                                                                                                                                                             | OLS, beta        | -1.00    | (-2.36 - 0.37)  | 1,321 |
| Parent’s Moderate Physical Activity (Mins/week)                                                                                                                                                                                                                                                                                                                                                                                                                                                                                                                                                                                                                                                                                                                                                                                                                                                                                                                                                                                                                                                                                                             | OLS, beta        | -0.10    | (-1.19 - 0.99)  | 1,316 |
| Times per week family eats dinner out                                                                                                                                                                                                                                                                                                                                                                                                                                                                                                                                                                                                                                                                                                                                                                                                                                                                                                                                                                                                                                                                                                                       | Poisson, IRR     | 1.00     | (0.99 - 1.00)   | 1,317 |
| Times per week family eats prepared food for dinner                                                                                                                                                                                                                                                                                                                                                                                                                                                                                                                                                                                                                                                                                                                                                                                                                                                                                                                                                                                                                                                                                                         | Poisson, IRR     | 1.02***  | (1.01 - 1.04)   | 1,315 |
| Home Food Environment Healthiness score                                                                                                                                                                                                                                                                                                                                                                                                                                                                                                                                                                                                                                                                                                                                                                                                                                                                                                                                                                                                                                                                                                                     | OLS, beta        | -0.08*** | (-0.11 - -0.05) | 1,318 |
| Notes: OLS: Ordinary Least Squares; IRR: Incidence-Rate Ratio; *** p<0.01, ** p<0.05; * p<0.10<br>All regressions control for installation county obesity rate; respondent’s age, gender, and race/ethnicity (non-Hispanic white, non-Hispanic black, Hispanic/Latino, Other); parent’s marital status, highest education level among child’s parents (High school or less; trade, technical or some college; Associate degree or equivalent; 4 year college or higher), military parent’s rank (Corporal/Specialist or lower; Sergeant; Staff Sergeant; Sergeant First Class; Master Sergeant/First Sergeant or higher); household income (<=\$40,000; \$40,001-\$50,000; \$50,001-\$85,000; \$85,001 or higher), number of children in the household (1, 2 and 3 or more), on-installation residence, and months at current installation (<=12, 13-24, 25-48 and >=49).<br>Reference Categories: Male, White non-Hispanic, living off-Installation, non-military parent respondent, unmarried, rank Corporal/Specialist or less, less than high school degree, household income<=40,000, one child in household, and at current installation <=12 months. |                  |          |                 |       |

To examine whether the county obesity rate was also associated with parent and child dietary and activity behaviors, we estimated ordered logistic, Poisson, and linear regression models for ordered categorical, count, and linear dependent variables, respectively. Measures of obesogenic behaviors and home environment, and the estimation results, are reported above.

*Measures of Obesogenic Behaviors and Home Environment*

Child’s physical activity was measured as minutes per week of moderate and vigorous physical activity (PA), and hours per week of watching television and playing videogames based on self-reports.

Children’s dietary intake was assessed via a modified version of the Beverage and Snack Questionnaire,<sup>21</sup> which asks about the number of times during the past 7 days that child consumed fruits, vegetables, diet and regular sodas, and types of salty snacks and sweets, among other beverages and foods. The response categories included: never, 1-3 times, 4-6 times, once a day, twice a day, thrice a day, 4+

times per day. No assumptions or guidance about portion size was provided. These responses were converted into counts of the number of *times per week* that the child reported consuming each food and beverage category. Mid-points of the range were used for response categories 1-3 times and 4-6 times in past 7 days. The dietary outcomes were available for children who completed the child survey.

Parent's physical activity was measured as minutes per week of moderate and vigorous physical activity (PA) based on self-reports.

Home healthiness score was computed by aggregating responses on survey questions asking parents – (1) how much they agreed or disagreed with statements about the healthiness of their home environment (see below), (3) limits that parents set for their children's consumption of SSBs, salty snacks, and sweets (0-1 times per week, 2-3 times per week, and so on), and (4) times per week family eats dinner out (at a restaurant or take-out) and dinner that was ready-made (e.g. frozen dinners, microwave meals).

*Please indicate how much you agree or disagree with the following statements about the food environment in your home:*

*Most of the food in the house is healthy*

*There are a lot of salty snacks in our house*

*There are a lot of sweets in our house*

*There are a lot of other high-fat foods in our house*

*There are a lot of sweetened beverages in our house*

*A variety of healthy foods is available to my child at each meal served at home.*

*Response scale: Strongly disagree, somewhat disagree, neutral, somewhat agree, strongly agree.*

A higher county obesity rate was associated with fewer minutes per week of vigorous activity in children and parents, but had no association time spent watching television or playing videogames. There were no associations for child-reported dietary intake measures. However, for parent-reported outcomes, a higher county obesity rate was associated with a lower home healthiness score, higher likelihood of eating prepared foods, and higher parent-set limits on children' SSB, salty snack and sweet consumption. These findings were similar even in models that additionally controlled for neighborhood built environment (not shown).

## **eAppendix. Shared Built Environment Measures, Information on Family Installation Choice, and References**

### **Shared Built Environment Measures**

E.1. Two measures of the county built environment were obtained from the RWJ County Health Rankings Data. (1) *Access to Exercise Opportunities*

Access to exercise opportunities measures the percentage of individuals in a county who live reasonably close to a location for physical activity. Locations for physical activity are defined as parks or recreational facilities. Parks include local, state, and national parks. Recreational facilities include businesses identified by the following Standard Industry Classification (SIC) codes and include a wide variety of facilities including gyms, community centers, YMCAs, dance studios and pools: 70110306, 79990000, 79910000, 79910100, 79910101, 79910102, 79910103, 79910202, 79910300, 79910301, 79910302, 79920000, 79970100, 79970203, 79970500, 79970501, 79970503, 79979900, 79990101, 79990102, 79990300, 79990301, 79990302, 79990303, 79990601, 79990602, 79990603, 79991102, 79991103, 79970201, 79991402, 79991109, 79991110, 79991111, 79991112, 79991113, 79991118, 79991119, 79991120, 79991121, 79991122, 79991123, 79991127, 79991412, 79999910, 79970502, 79970504, 79979904, 79979906.

Individuals who:

- Reside in a census block within a half mile of a park or
- In urban census tracts: reside within one mile of a recreational facility
- In rural census tracts: reside within three miles of a recreational facility

are considered to have adequate access for opportunities for physical activity.

(2) *Limited Access to Healthy Foods*

Limited access to healthy foods is the percentage of the population who are low income and do not live close to a grocery store. Living close to a grocery store is defined differently in rural and non-rural areas; in rural areas, it means living less than 10 miles from a grocery store; in non-rural areas, less than 1 mile. Low income is defined as having an annual family income of less than or equal to 200 percent of the federal poverty threshold for the family size.

E.2. Three measures of the neighborhood built environment were computed based on geocoding of respondents' residences using ArcGIS, and data on business establishments (using NAICS codes) and street connectivity from Esri Business Analyst. The following counts were computed for a 2-mile buffer (based on Euclidean distance) around the respondent's residence. We also measured buffers using street network distance and got similar results (not shown).

- number of grocery stores
- number of sports and recreational facilities
- number of street intersections (captures walkability)

E.3. A subjective measure of the overall neighborhood environment, the Neighborhood Environment Walkability Scale – Youth version (NEWS-Y), was collected during our parent surveys. Parents completed the parent version of the youth-focused NEWS questionnaire developed and validated by Saelens and colleagues (Saelens et al. 2003; Rosenberg et al. 2009; Adams et al. 2009). The NEWS-Y provides succinct and empirically-derived measures of various aspects of the neighborhood environment related to youth PA. The questionnaire consists of 66 items that can be allocated into nine subscales capturing land use mix (diversity), proximity to recreation facilities, land use mix (access), street connectivity, walking/cycling facilities, aesthetics, pedestrian/automobile traffic safety, and crime safety. The full text of the NEWS-Y scale is available online at [http://sallis.ucsd.edu/Documents/Measures\\_documents/NEWS\\_Y\\_parent.pdf](http://sallis.ucsd.edu/Documents/Measures_documents/NEWS_Y_parent.pdf).

In alternate models, we also included *both* the neighborhood built and environment measures and the overall score of neighborhood walkability computed from the parent-responses on the parent-version of the validated Neighborhood Environment Walkability Scale – Youth (NEWS-Y) that was included in the parent survey. The results were similar and are available upon request.

## Information on Family Installation Choice

The duration of residence at or on a given installation is outside the control of individual military personnel and their families with rare exceptions;<sup>7</sup> among the few service members who qualify for the Exceptional Family Member Program, families are assigned among the pool of installations which meet their needs as long as military readiness is not affected. See reference 7.

## References

1. Xi, B et al. Trends in Abdominal Obesity Among US Children and Adolescents. *Pediatrics*. 2014; 134(2): e334-e339. doi: 10.1542/peds.2014-0970.
2. Fernandez JR., Redden DT, Pietrobelli A, and Allison DB. Waist circumference percentiles in nationally representative samples of African-American, European-American, and Mexican-American children and adolescents. *Journal of Pediatrics*. 2004; 145(4): 439-444. doi: 10.1016/j.jpeds.2004.06.044.
3. McCarthy, HD & Ashwell, M. A study of central fatness using waist-to-height ratios in UK children and adolescents over two decades supports the simple message - ‘keep your waist circumference to less than half your height’. *International Journal of Obesity*. 2006; 30(6): 988-992. doi: 10.1038/sj.ijo.0803226.
4. Williams DP, Going SB, Lohman TG, et al. Body fatness and risk for elevated blood pressure, total cholesterol, and serum lipoprotein ratios in children and adolescents. *Am J Public Health* 1992;82(3):358–63.
5. Taylor, R. W., A. Falorni, I. E. Jones and A. Goulding (2003). "Identifying adolescents with high percentage body fat: a comparison of BMI cutoffs using age and stage of pubertal development compared with BMI cutoffs using age alone." *Eur J Clin Nutr* 57(6): 764-769.
6. CDC. Methods and References for County-Level Estimates and Ranks and State-Level Modeled Estimates; <https://www.cdc.gov/diabetes/pdfs/data/calculating-methods-references-county-level-estimates-ranks.pdf>.
7. US Department of the Army. Army Regulation 614-200: Enlisted Assignments and Utilization Management (Rapid Action Revision). [http://www.ssi.army.mil/ncoa/AGS\\_SLC\\_ALC\\_REGS/AR%20614-200.pdf](http://www.ssi.army.mil/ncoa/AGS_SLC_ALC_REGS/AR%20614-200.pdf). Published September 3, 2009. Accessed November 13, 2017.



**eFigure 1: Study Sample Flow Chart**

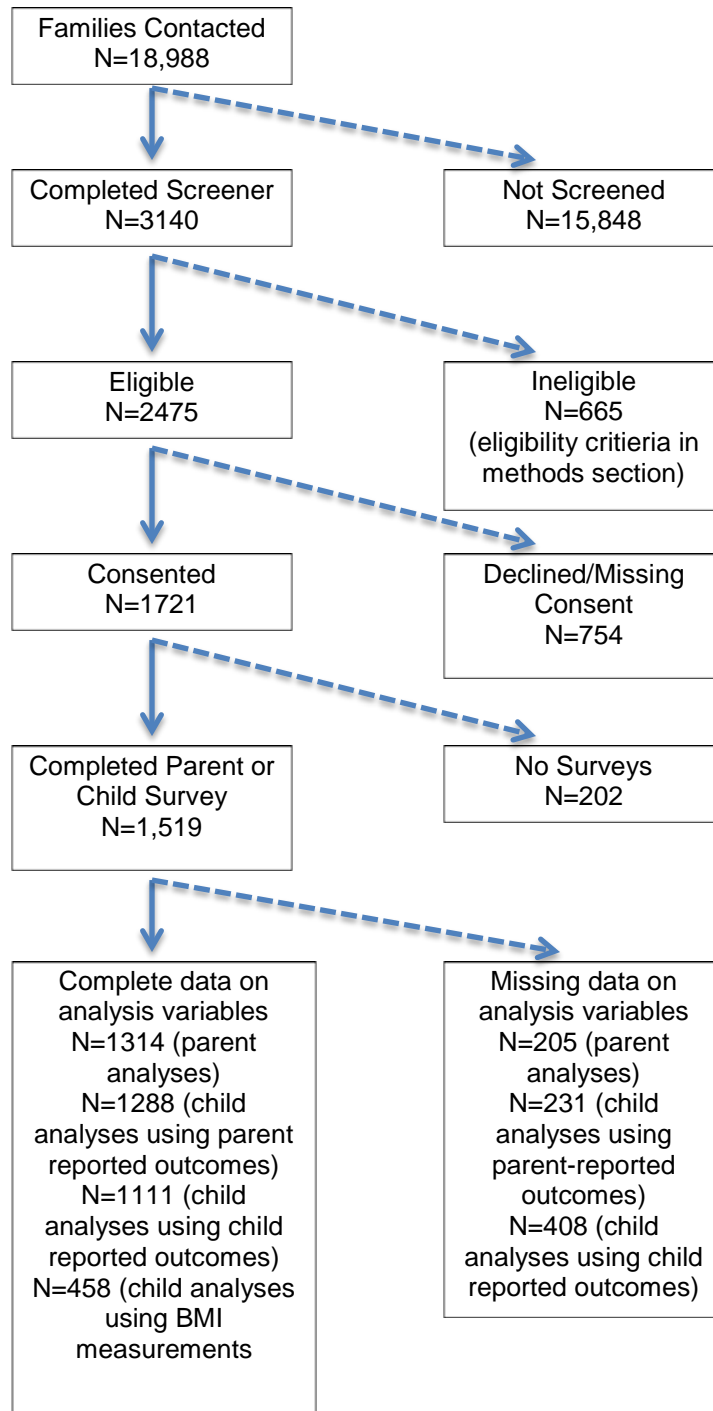

Supplement: jamapediatr-172-239-s001.pdf [file jamapediatr-172-239-s001.pdf]
